# Supplementary material for: A network meta-analysis assessing the effectiveness of various radical and conservative surgical approaches regarding recurrence in treating solid/multicystic ameloblastomas
Source: PubMed Central journal article supplement (PMC10213029; doi:10.1038/s41598-023-32190-7), 2023-05-25
Supplement: 41598_2023_32190_MOESM1_ESM.pdf [file 41598_2023_32190_MOESM1_ESM.pdf]

# A network meta-analysis assessing the effectiveness of various radical and conservative surgical approaches regarding recurrence in treating solid/multicystic ameloblastomas:

## Supplementary information files

Faqi Nurdiansyah Hendra <sup>1,2,\*</sup>, Marco N. Helder <sup>1</sup>, Muhammad Ruslin <sup>3</sup>, Ellen M. Van Cann <sup>1,4</sup>, Tymour Forouzanfar <sup>1</sup>

<sup>1</sup> Department of Oral and Maxillofacial Surgery/Pathology, Amsterdam UMC and Academic Centre for Dentistry Amsterdam (ACTA), Vrije Universiteit Amsterdam, Cancer Center Amsterdam, Amsterdam, the Netherlands

<sup>2</sup> Department of Anatomy, Faculty of Medicine, Hasanuddin University, Makassar, Indonesia

<sup>3</sup> Department of Oral and Maxillofacial Surgery, Faculty of Dentistry, Hasanuddin University, Makassar, Indonesia

<sup>4</sup> Department of Head and Neck Surgical Oncology, UMC Utrecht Cancer Center, University Medical Center Utrecht, Utrecht, the Netherlands

\* Corresponding author: Faqi Nurdiansyah Hendra

## List of contents

| Title                                                                                                                                                                                       | page |
|---------------------------------------------------------------------------------------------------------------------------------------------------------------------------------------------|------|
| Supplementary Table 1. Search strategy and search results details.                                                                                                                          | 2    |
| Supplementary Table 2. The reasons for the excluded studies.                                                                                                                                | 3    |
| Supplementary Table 3. Network inconsistency.                                                                                                                                               | 4    |
| Supplementary Table 4. Confidence assessments in network meta-analysis of treatment approach comparisons.                                                                                   | 5    |
| Supplementary Table 5. SUCRA values for the ameloblastoma treatments network. (A) estimated probabilities; (B) predictive probabilities.                                                    | 6    |
| Supplementary Table 6. PRISMA 2020 checklist.                                                                                                                                               | 7    |
| Supplementary Table 7. PRISMA network meta-analysis checklist.                                                                                                                              | 9    |
| Supplementary Figure 1. Relative ranking of treatments for the ameloblastoma network based on the multidimensional scaling (MDS) approach.                                                  | 13   |
| Supplementary Figure 2. Comparison-adjusted funnel plot of the ameloblastoma treatments network.                                                                                            | 14   |
| Supplementary Figure 3. Interval plot of treatment approach comparisons for recurrence outcome using Odds Ratio (OR) to measure the effect size.                                            | 15   |
| Supplementary Figure 4. Network forest plots of treatment approach comparisons.                                                                                                             | 16   |
| Supplementary Figure 5. Cumulative probability curves for the ameloblastoma treatments network show that each treatment's estimated and predictive probabilities are up to a specific rank. | 17   |

Supplementary Table 1. Search strategy and search results details.

| Database         | Search Query                                                                                                                                                                                                                                                                                                                                                                                                                                                                                                                                                                                                                                                                                                                                                                                                                                                                                                                                                                                                                                                                                                                                                                                                                                                                                                                                                                                                                                                                                                                            | Date      | Number of Results |
|------------------|-----------------------------------------------------------------------------------------------------------------------------------------------------------------------------------------------------------------------------------------------------------------------------------------------------------------------------------------------------------------------------------------------------------------------------------------------------------------------------------------------------------------------------------------------------------------------------------------------------------------------------------------------------------------------------------------------------------------------------------------------------------------------------------------------------------------------------------------------------------------------------------------------------------------------------------------------------------------------------------------------------------------------------------------------------------------------------------------------------------------------------------------------------------------------------------------------------------------------------------------------------------------------------------------------------------------------------------------------------------------------------------------------------------------------------------------------------------------------------------------------------------------------------------------|-----------|-------------------|
| PubMed (Medline) | ameloblastoma AND (radical OR conservative OR resection) AND (recurrence OR relapse) ("ameloblastoma"[MeSH Terms] OR "ameloblastoma"[All Fields] OR "ameloblastomas"[All Fields]) AND ("radical"[All Fields] OR "radical s"[All Fields] OR "radicals"[All Fields] OR ("conservancies"[All Fields] OR "conservancy"[All Fields] OR "conservancy s"[All Fields] OR "conservation"[All Fields] OR "conservational"[All Fields] OR "conservations"[All Fields] OR "conservative"[All Fields] OR "conservatively"[All Fields] OR "conservatives"[All Fields] OR "conserve"[All Fields] OR "conserved"[All Fields] OR "conserves"[All Fields] OR "conserving"[All Fields]) OR ("resect"[All Fields] OR "resectability"[All Fields] OR "resectable"[All Fields] OR "resectates"[All Fields] OR "resected"[All Fields] OR "resecting"[All Fields] OR "resection"[All Fields] OR "resectional"[All Fields] OR "resectioned"[All Fields] OR "resectioning"[All Fields] OR "resections"[All Fields] OR "resective"[All Fields] OR "resects"[All Fields])) AND ("recurrence"[All Fields] OR "recurrence"[MeSH Terms] OR "recurrence"[All Fields] OR "recurrences"[All Fields] OR "recurrencies"[All Fields] OR "recurrency"[All Fields] OR "recurrent"[All Fields] OR "recurrently"[All Fields] OR "recurrents"[All Fields] OR ("recurrence"[MeSH Terms] OR "recurrence"[All Fields] OR "relapse"[All Fields] OR "relapses"[All Fields] OR "relapsing"[All Fields] OR "relapsed"[All Fields] OR "relapser"[All Fields] OR "relapsers"[All Fields])) | 10-Aug-21 | 434               |
| ScienceDirect    | ameloblastoma AND (radical OR conservative OR resection) AND (recurrence OR relapse)                                                                                                                                                                                                                                                                                                                                                                                                                                                                                                                                                                                                                                                                                                                                                                                                                                                                                                                                                                                                                                                                                                                                                                                                                                                                                                                                                                                                                                                    | 10-Aug-21 | 1120              |
| Scopus           | ameloblastoma AND (radical OR conservative OR resection) AND (recurrence OR relapse)                                                                                                                                                                                                                                                                                                                                                                                                                                                                                                                                                                                                                                                                                                                                                                                                                                                                                                                                                                                                                                                                                                                                                                                                                                                                                                                                                                                                                                                    | 10-Aug-21 | 1033              |
| Web of Science   | ameloblastoma AND (radical OR conservative OR resection) AND (recurrence OR relapse)                                                                                                                                                                                                                                                                                                                                                                                                                                                                                                                                                                                                                                                                                                                                                                                                                                                                                                                                                                                                                                                                                                                                                                                                                                                                                                                                                                                                                                                    | 10-Aug-21 | 224               |
| TOTAL            |                                                                                                                                                                                                                                                                                                                                                                                                                                                                                                                                                                                                                                                                                                                                                                                                                                                                                                                                                                                                                                                                                                                                                                                                                                                                                                                                                                                                                                                                                                                                         |           | 2811              |

Supplementary Table 2. The reasons for the excluded studies.

| Reason for exclusion                                                     | Articles excluded                                                                                                                                                                                                                                                                                                                                                                                                   |
|--------------------------------------------------------------------------|---------------------------------------------------------------------------------------------------------------------------------------------------------------------------------------------------------------------------------------------------------------------------------------------------------------------------------------------------------------------------------------------------------------------|
| No data about the histopathological type                                 | Saraiya 2020; Adeel et al. 2018; Hammarfjord et al. 2013; Chaine et al. 2009; Chana et al. 2004; Arotiba et al. 1997; Olaitan & Adekeye 1996; Olaitan et al. 1993; Muller & Slootweg 1985; Holland & Mellor 1991; Adekeye 1980                                                                                                                                                                                      |
| Failure to differentiate histopathological type regarding treatment used | Goh et al. 2021; Hresko et al. 2021; Okechi et al. 2020; Menon et al. 2019; Au et al. 2019; Laborde et al. 2017; Milman et al. 2016; Franca et al. 2012; Li et al. 2012; Dandriyal et al. 2011; Rastogi et al. 2010; Escande et al. 2009; Sammartino et al. 2007; Adebayo et al. 2005; Hatada et al. 2001; Sampson & Pogrel 1999; Chidzonga et al. 1996; Pinsolle et al. 1995; Ueno et al. 1989; Sehdev et al. 1974 |
| Not specifying the treatment approach                                    | Goh et al. 2021; Hresko et al. 2021; Singh et al. 2015; Ghandhi et al. 2006;                                                                                                                                                                                                                                                                                                                                        |
| Only one type of treatment used                                          | Haq et al. 2016; Ooi et al. 2014; Carneiro et al. 2014; Bianchi et al. 2013; Bataineh 2000; Vedtofte et al. 1978                                                                                                                                                                                                                                                                                                    |
| Recurrence is unclear regarding the type of treatment                    | Vongsa et al. 2013; Zhang et al. 2010; Molla et al. 1991                                                                                                                                                                                                                                                                                                                                                            |
| Recurrence is unclear regarding the treatment of the primary tumor       | Hertog et al. 2012; Fregnani et al. 2010                                                                                                                                                                                                                                                                                                                                                                            |
| Possibility of duplicate data                                            | Hertog et al. 2012; Olaitan et al. 1993                                                                                                                                                                                                                                                                                                                                                                             |
| Case reports or fewer than 10 cases                                      | Singh et al. 2014; Andrade et al. 2013; Carneiro et al. 2014; Huang et al. 2007; Zwahlen & Gratz 2002;                                                                                                                                                                                                                                                                                                              |
| Follow-up is not specified or unclear                                    | Okechi et al. 2020; Giraddi et al. 2018; Vongsa et al. 2013; Franca et al. 2012; Gunawardhana et al. 2010; Vayvada et al. 2006; Arotiba et al. 1997; Chidzonga et al. 1996; Sehdev et al. 1974                                                                                                                                                                                                                      |

Supplementary Table 3. Network inconsistency.

chi2(3) = 0.33

Prob > chi2 = 0.9547

| Loop  | IF    | seIF  | z_value | p_value | CI_95       | Loop_Heterog_tau2 |
|-------|-------|-------|---------|---------|-------------|-------------------|
| C-D-E | 0.858 | 2.340 | 0.367   | 0.714   | (0.00,5.45) | 0.000             |
| D-E-F | 0.687 | 2.550 | 0.269   | 0.788   | (0.00,5.68) | 0.000             |
| B-E-F | 0.687 | 2.695 | 0.255   | 0.799   | (0.00,5.97) | 0.000             |
| C-D-F | 0.443 | 2.164 | 0.204   | 0.838   | (0.00,4.68) | 0.000             |
| C-E-F | 0.304 | 1.661 | 0.183   | 0.855   | (0.00,3.56) | 0.000             |
| B-D-E | .     | .     | .       | .       |             | 0.000             |
| B-D-F | .     | .     | .       | .       |             | 0.000             |

Notes: B = Enucleation + Carnoy's solution, C = Enucleation, D = Enucleation + Curettage, E =Marginal resection, F = Segmental resection.

Supplementary Table 4. Confidence assessments in network meta-analysis of treatment approach comparisons.

| Comparison | Number of studies | Within-study bias | Reporting bias | Indirectness | Imprecision    | Heterogeneity | Incoherence | Confidence rating | Reason(s) for downgrading            |
|------------|-------------------|-------------------|----------------|--------------|----------------|---------------|-------------|-------------------|--------------------------------------|
| CCR:MR     | 1                 | Some concerns     | Low risk       | No concerns  | Major concerns | No concerns   | No concerns | Low               | ["Within-study bias", "Imprecision"] |
| ECS:En     | 1                 | Some concerns     | Low risk       | No concerns  | Major concerns | No concerns   | No concerns | Low               | ["Within-study bias", "Imprecision"] |
| ECS:MR     | 1                 | Some concerns     | Low risk       | No concerns  | Major concerns | No concerns   | No concerns | Low               | ["Within-study bias", "Imprecision"] |
| ECS:SR     | 1                 | Some concerns     | Low risk       | No concerns  | Major concerns | No concerns   | No concerns | Low               | ["Within-study bias", "Imprecision"] |
| En:ENCU    | 1                 | Some concerns     | Low risk       | No concerns  | Major concerns | No concerns   | No concerns | Low               | ["Within-study bias", "Imprecision"] |
| ENCU:MR    | 2                 | Some concerns     | Low risk       | No concerns  | Major concerns | No concerns   | No concerns | Low               | ["Within-study bias", "Imprecision"] |
| ENCU:SR    | 2                 | Some concerns     | Low risk       | No concerns  | Major concerns | No concerns   | No concerns | Low               | ["Within-study bias", "Imprecision"] |
| En:MR      | 1                 | Some concerns     | Low risk       | No concerns  | Major concerns | No concerns   | No concerns | Low               | ["Within-study bias", "Imprecision"] |
| En:SR      | 1                 | Some concerns     | Low risk       | No concerns  | Major concerns | No concerns   | No concerns | Low               | ["Within-study bias", "Imprecision"] |
| MR:SR      | 5                 | Some concerns     | Low risk       | No concerns  | Major concerns | No concerns   | No concerns | Low               | ["Within-study bias", "Imprecision"] |
| CCR:ECS    | 0                 | Some concerns     | Low risk       | No concerns  | Major concerns | No concerns   | No concerns | Low               | ["Within-study bias", "Imprecision"] |
| CCR:ENCU   | 0                 | Some concerns     | Low risk       | No concerns  | Major concerns | No concerns   | No concerns | Low               | ["Within-study bias", "Imprecision"] |
| CCR:En     | 0                 | Some concerns     | Low risk       | No concerns  | Major concerns | No concerns   | No concerns | Low               | ["Within-study bias", "Imprecision"] |
| CCR:SR     | 0                 | Some concerns     | Low risk       | No concerns  | Major concerns | No concerns   | No concerns | Low               | ["Within-study bias", "Imprecision"] |
| ECS:ENCU   | 0                 | Some concerns     | Low risk       | No concerns  | Major concerns | No concerns   | No concerns | Low               | ["Within-study bias", "Imprecision"] |

Notes: CCR = Curettage + Cryotherapy, ECS = Enucleation + Carnoy's solution, En = Enucleation, ENCU = Enucleation + Curettage, MR = Marginal resection, SR = Segmental resection.

Supplementary Table 5. SUCRA values for the ameloblastoma treatments network. (A) estimated probabilities; (B) predictive probabilities.

A

| Treatment | SUCRA | PrBest | MeanRank |
|-----------|-------|--------|----------|
| En        | 17.3  | 1.2    | 5.1      |
| CCR       | 66.9  | 37.4   | 2.7      |
| ECS       | 45.1  | 17.3   | 3.7      |
| ENCU      | 43.7  | 4.9    | 3.8      |
| MR        | 49.3  | 4.2    | 3.5      |
| SR        | 77.7  | 35.0   | 2.1      |

B

| Treatment | SUCRA | PrBest | MeanRank |
|-----------|-------|--------|----------|
| En        | 17.6  | 1.0    | 5.1      |
| CCR       | 67.0  | 37.4   | 2.7      |
| ECS       | 45.7  | 18.7   | 3.7      |
| ENCU      | 43.0  | 4.8    | 3.8      |
| MR        | 49.4  | 4.2    | 3.5      |
| SR        | 77.2  | 34.0   | 2.1      |

Notes: CCR = Curettage + Cryotherapy, ECS = Enucleation + Carnoy's solution, En = Enucleation, ENCU = Enucleation + Curettage, MR = Marginal resection, SR = Segmental resection.

Supplementary Table 6. PRISMA 2020 checklist.

| Section and Topic             | Item # | Checklist item                                                                                                                                                                                                                                                                                       | Location where item is reported (page) |
|-------------------------------|--------|------------------------------------------------------------------------------------------------------------------------------------------------------------------------------------------------------------------------------------------------------------------------------------------------------|----------------------------------------|
| <b>TITLE</b>                  |        |                                                                                                                                                                                                                                                                                                      |                                        |
| Title                         | 1      | Identify the report as a systematic review.                                                                                                                                                                                                                                                          | 1                                      |
| <b>ABSTRACT</b>               |        |                                                                                                                                                                                                                                                                                                      |                                        |
| Abstract                      | 2      | See the PRISMA 2020 for Abstracts checklist.                                                                                                                                                                                                                                                         | 1                                      |
| <b>INTRODUCTION</b>           |        |                                                                                                                                                                                                                                                                                                      |                                        |
| Rationale                     | 3      | Describe the rationale for the review in the context of existing knowledge.                                                                                                                                                                                                                          | 2                                      |
| Objectives                    | 4      | Provide an explicit statement of the objective(s) or question(s) the review addresses.                                                                                                                                                                                                               | 2                                      |
| <b>METHODS</b>                |        |                                                                                                                                                                                                                                                                                                      |                                        |
| Eligibility criteria          | 5      | Specify the inclusion and exclusion criteria for the review and how studies were grouped for the syntheses.                                                                                                                                                                                          | 3                                      |
| Information sources           | 6      | Specify all databases, registers, websites, organisations, reference lists and other sources searched or consulted to identify studies. Specify the date when each source was last searched or consulted.                                                                                            | 3                                      |
| Search strategy               | 7      | Present the full search strategies for all databases, registers and websites, including any filters and limits used.                                                                                                                                                                                 | 3                                      |
| Selection process             | 8      | Specify the methods used to decide whether a study met the inclusion criteria of the review, including how many reviewers screened each record and each report retrieved, whether they worked independently, and if applicable, details of automation tools used in the process.                     | 3                                      |
| Data collection process       | 9      | Specify the methods used to collect data from reports, including how many reviewers collected data from each report, whether they worked independently, any processes for obtaining or confirming data from study investigators, and if applicable, details of automation tools used in the process. | 3                                      |
| Data items                    | 10a    | List and define all outcomes for which data were sought. Specify whether all results that were compatible with each outcome domain in each study were sought (e.g. for all measures, time points, analyses), and if not, the methods used to decide which results to collect.                        | 3                                      |
|                               | 10b    | List and define all other variables for which data were sought (e.g. participant and intervention characteristics, funding sources). Describe any assumptions made about any missing or unclear information.                                                                                         | 3                                      |
| Study risk of bias assessment | 11     | Specify the methods used to assess risk of bias in the included studies, including details of the tool(s) used, how many reviewers assessed each study and whether they worked independently, and if applicable, details of automation tools used in the process.                                    | 4                                      |
| Effect measures               | 12     | Specify for each outcome the effect measure(s) (e.g. risk ratio, mean difference) used in the synthesis or presentation of results.                                                                                                                                                                  | 4                                      |
| Synthesis methods             | 13a    | Describe the processes used to decide which studies were eligible for each synthesis (e.g. tabulating the study intervention characteristics and comparing against the planned groups for each synthesis (item #5)).                                                                                 | 4                                      |
|                               | 13b    | Describe any methods required to prepare the data for presentation or synthesis, such as handling of missing summary statistics, or data conversions.                                                                                                                                                | 4                                      |
|                               | 13c    | Describe any methods used to tabulate or visually display results of individual studies and syntheses.                                                                                                                                                                                               | 4                                      |
|                               | 13d    | Describe any methods used to synthesize results and provide a rationale for the choice(s). If meta-analysis was performed, describe the model(s), method(s) to identify the presence and extent of statistical heterogeneity, and software package(s) used.                                          | 4                                      |
|                               | 13e    | Describe any methods used to explore possible causes of heterogeneity among study results (e.g. subgroup analysis, meta-regression).                                                                                                                                                                 | Not Applicable                         |
|                               | 13f    | Describe any sensitivity analyses conducted to assess robustness of the synthesized results.                                                                                                                                                                                                         | Not Applicable                         |

| Section and Topic                              | Item # | Checklist item                                                                                                                                                                                                                                                                       | Location where item is reported (page) |
|------------------------------------------------|--------|--------------------------------------------------------------------------------------------------------------------------------------------------------------------------------------------------------------------------------------------------------------------------------------|----------------------------------------|
| Reporting bias assessment                      | 14     | Describe any methods used to assess risk of bias due to missing results in a synthesis (arising from reporting biases).                                                                                                                                                              | 4                                      |
| Certainty assessment                           | 15     | Describe any methods used to assess certainty (or confidence) in the body of evidence for an outcome.                                                                                                                                                                                | 4                                      |
| <b>RESULTS</b>                                 |        |                                                                                                                                                                                                                                                                                      |                                        |
| Study selection                                | 16a    | Describe the results of the search and selection process, from the number of records identified in the search to the number of studies included in the review, ideally using a flow diagram.                                                                                         | 5 & 13                                 |
|                                                | 16b    | Cite studies that might appear to meet the inclusion criteria, but which were excluded, and explain why they were excluded.                                                                                                                                                          | 5                                      |
| Study characteristics                          | 17     | Cite each included study and present its characteristics.                                                                                                                                                                                                                            | 5 & 11                                 |
| Risk of bias in studies                        | 18     | Present assessments of risk of bias for each included study.                                                                                                                                                                                                                         | 5 & 14                                 |
| Results of individual studies                  | 19     | For all outcomes, present, for each study: (a) summary statistics for each group (where appropriate) and (b) an effect estimate and its precision (e.g. confidence/credible interval), ideally using structured tables or plots.                                                     | 5 & 6                                  |
| Results of syntheses                           | 20a    | For each synthesis, briefly summarise the characteristics and risk of bias among contributing studies.                                                                                                                                                                               | 5                                      |
|                                                | 20b    | Present results of all statistical syntheses conducted. If meta-analysis was done, present for each the summary estimate and its precision (e.g. confidence/credible interval) and measures of statistical heterogeneity. If comparing groups, describe the direction of the effect. | 5 & 6                                  |
|                                                | 20c    | Present results of all investigations of possible causes of heterogeneity among study results.                                                                                                                                                                                       | 5 & 6                                  |
|                                                | 20d    | Present results of all sensitivity analyses conducted to assess the robustness of the synthesized results.                                                                                                                                                                           | Not Applicable                         |
| Reporting biases                               | 21     | Present assessments of risk of bias due to missing results (arising from reporting biases) for each synthesis assessed.                                                                                                                                                              | 6                                      |
| Certainty of evidence                          | 22     | Present assessments of certainty (or confidence) in the body of evidence for each outcome assessed.                                                                                                                                                                                  | 6                                      |
| <b>DISCUSSION</b>                              |        |                                                                                                                                                                                                                                                                                      |                                        |
| Discussion                                     | 23a    | Provide a general interpretation of the results in the context of other evidence.                                                                                                                                                                                                    | 6                                      |
|                                                | 23b    | Discuss any limitations of the evidence included in the review.                                                                                                                                                                                                                      | 7                                      |
|                                                | 23c    | Discuss any limitations of the review processes used.                                                                                                                                                                                                                                | 7                                      |
|                                                | 23d    | Discuss implications of the results for practice, policy, and future research.                                                                                                                                                                                                       | 7                                      |
| <b>OTHER INFORMATION</b>                       |        |                                                                                                                                                                                                                                                                                      |                                        |
| Registration and protocol                      | 24a    | Provide registration information for the review, including register name and registration number, or state that the review was not registered.                                                                                                                                       | 2                                      |
|                                                | 24b    | Indicate where the review protocol can be accessed, or state that a protocol was not prepared.                                                                                                                                                                                       | 2                                      |
|                                                | 24c    | Describe and explain any amendments to information provided at registration or in the protocol.                                                                                                                                                                                      | 2                                      |
| Support                                        | 25     | Describe sources of financial or non-financial support for the review, and the role of the funders or sponsors in the review.                                                                                                                                                        | 10                                     |
| Competing interests                            | 26     | Declare any competing interests of review authors.                                                                                                                                                                                                                                   | 10 (none declared)                     |
| Availability of data, code and other materials | 27     | Report which of the following are publicly available and where they can be found: template data collection forms; data extracted from included studies; data used for all analyses; analytic code; any other materials used in the review.                                           | 7 & supplementary information files    |



Supplementary Table 7. PRISMA network meta-analysis checklist.

| Section/Topic             | Item # | Checklist Item                                                                                                                                                                                                                                                                                                                                                                                                                                                                                                                                                                                                                                                                                                                                                                          | Reported on Page # |
|---------------------------|--------|-----------------------------------------------------------------------------------------------------------------------------------------------------------------------------------------------------------------------------------------------------------------------------------------------------------------------------------------------------------------------------------------------------------------------------------------------------------------------------------------------------------------------------------------------------------------------------------------------------------------------------------------------------------------------------------------------------------------------------------------------------------------------------------------|--------------------|
| <b>TITLE</b>              |        |                                                                                                                                                                                                                                                                                                                                                                                                                                                                                                                                                                                                                                                                                                                                                                                         |                    |
| Title                     | 1      | Identify the report as a systematic review <i>incorporating a network meta-analysis (or related form of meta-analysis)</i> .                                                                                                                                                                                                                                                                                                                                                                                                                                                                                                                                                                                                                                                            | 1                  |
| <b>ABSTRACT</b>           |        |                                                                                                                                                                                                                                                                                                                                                                                                                                                                                                                                                                                                                                                                                                                                                                                         |                    |
| Structured summary        | 2      | Provide a structured summary including, as applicable:<br><b>Background:</b> main objectives<br><b>Methods:</b> data sources; study eligibility criteria, participants, and interventions; study appraisal; and <i>synthesis methods, such as network meta-analysis</i> .<br><b>Results:</b> number of studies and participants identified; summary estimates with corresponding confidence/credible intervals; <i>treatment rankings may also be discussed. Authors may choose to summarize pairwise comparisons against a chosen treatment included in their analyses for brevity.</i><br><b>Discussion/Conclusions:</b> limitations; conclusions and implications of findings.<br><b>Other:</b> primary source of funding; systematic review registration number with registry name. | 1                  |
| <b>INTRODUCTION</b>       |        |                                                                                                                                                                                                                                                                                                                                                                                                                                                                                                                                                                                                                                                                                                                                                                                         |                    |
| Rationale                 | 3      | Describe the rationale for the review in the context of what is already known, <i>including mention of why a network meta-analysis has been conducted</i> .                                                                                                                                                                                                                                                                                                                                                                                                                                                                                                                                                                                                                             | 2                  |
| Objectives                | 4      | Provide an explicit statement of questions being addressed, with reference to participants, interventions, comparisons, outcomes, and study design (PICOS).                                                                                                                                                                                                                                                                                                                                                                                                                                                                                                                                                                                                                             | 2                  |
| <b>METHODS</b>            |        |                                                                                                                                                                                                                                                                                                                                                                                                                                                                                                                                                                                                                                                                                                                                                                                         |                    |
| Protocol and registration | 5      | Indicate whether a review protocol exists and if and where it can be accessed (e.g., Web address); and, if available, provide registration information, including registration number.                                                                                                                                                                                                                                                                                                                                                                                                                                                                                                                                                                                                  | 2                  |
| Eligibility criteria      | 6      | Specify study characteristics (e.g., PICOS, length of follow-up) and report characteristics (e.g., years considered, language, publication status) used as criteria for eligibility, giving rationale. <i>Clearly describe eligible treatments included in the treatment network, and note whether any have been clustered or merged into the same node (with justification)</i> .                                                                                                                                                                                                                                                                                                                                                                                                      | 3                  |
| Information sources       | 7      | Describe all information sources (e.g., databases with dates of coverage, contact with study authors to identify additional studies) in the search and date last searched.                                                                                                                                                                                                                                                                                                                                                                                                                                                                                                                                                                                                              | 3                  |

|                                        |           |                                                                                                                                                                                                                                                                                                                                                                                                                                 |   |
|----------------------------------------|-----------|---------------------------------------------------------------------------------------------------------------------------------------------------------------------------------------------------------------------------------------------------------------------------------------------------------------------------------------------------------------------------------------------------------------------------------|---|
| Search                                 | 8         | Present full electronic search strategy for at least one database, including any limits used, such that it could be repeated.                                                                                                                                                                                                                                                                                                   | 3 |
| Study selection                        | 9         | State the process for selecting studies (i.e., screening, eligibility, included in systematic review, and, if applicable, included in the meta-analysis).                                                                                                                                                                                                                                                                       | 3 |
| Data collection process                | 10        | Describe method of data extraction from reports (e.g., piloted forms, independently, in duplicate) and any processes for obtaining and confirming data from investigators.                                                                                                                                                                                                                                                      | 3 |
| Data items                             | 11        | List and define all variables for which data were sought (e.g., PICOS, funding sources) and any assumptions and simplifications made.                                                                                                                                                                                                                                                                                           | 3 |
| <b>Geometry of the network</b>         | <b>S1</b> | Describe methods used to explore the geometry of the treatment network under study and potential biases related to it. This should include how the evidence base has been graphically summarized for presentation, and what characteristics were compiled and used to describe the evidence base to readers.                                                                                                                    | 4 |
| Risk of bias within individual studies | 12        | Describe methods used for assessing risk of bias of individual studies (including specification of whether this was done at the study or outcome level), and how this information is to be used in any data synthesis.                                                                                                                                                                                                          | 4 |
| Summary measures                       | 13        | State the principal summary measures (e.g., risk ratio, difference in means). <i>Also describe the use of additional summary measures assessed, such as treatment rankings and surface under the cumulative ranking curve (SUCRA) values, as well as modified approaches used to present summary findings from meta-analyses.</i>                                                                                               | 4 |
| Planned methods of analysis            | 14        | Describe the methods of handling data and combining results of studies for each network meta-analysis. This should include, but not be limited to: <ul style="list-style-type: none"> <li>• <i>Handling of multi-arm trials;</i></li> <li>• <i>Selection of variance structure;</i></li> <li>• <i>Selection of prior distributions in Bayesian analyses;</i></li> <li>and</li> <li>• <i>Assessment of model fit.</i></li> </ul> | 4 |
| <b>Assessment of Inconsistency</b>     | <b>S2</b> | Describe the statistical methods used to evaluate the agreement of direct and indirect evidence in the treatment network(s) studied. Describe efforts taken to address its presence when found.                                                                                                                                                                                                                                 | 4 |
| Risk of bias across studies            | 15        | Specify any assessment of risk of bias that may affect the cumulative evidence (e.g., publication bias, selective reporting within studies).                                                                                                                                                                                                                                                                                    | 4 |
| Additional analyses                    | 16        | Describe methods of additional analyses if done, indicating which were pre-specified. This may include, but not be limited to, the following: <ul style="list-style-type: none"> <li>• Sensitivity or subgroup analyses;</li> <li>• Meta-regression analyses;</li> <li>• <i>Alternative formulations of the treatment network;</i></li> <li>and</li> </ul>                                                                      | 4 |

- *Use of alternative prior distributions for Bayesian analyses (if applicable).*

## RESULTS†

|                                          |           |                                                                                                                                                                                                                                                                                                                                                                                                                                                              |        |
|------------------------------------------|-----------|--------------------------------------------------------------------------------------------------------------------------------------------------------------------------------------------------------------------------------------------------------------------------------------------------------------------------------------------------------------------------------------------------------------------------------------------------------------|--------|
| Study selection                          | 17        | Give numbers of studies screened, assessed for eligibility, and included in the review, with reasons for exclusions at each stage, ideally with a flow diagram.                                                                                                                                                                                                                                                                                              | 5 & 13 |
| <b>Presentation of network structure</b> | <b>S3</b> | Provide a network graph of the included studies to enable visualization of the geometry of the treatment network.                                                                                                                                                                                                                                                                                                                                            | 5 & 15 |
| <b>Summary of network geometry</b>       | <b>S4</b> | Provide a brief overview of characteristics of the treatment network. This may include commentary on the abundance of trials and randomized patients for the different interventions and pairwise comparisons in the network, gaps of evidence in the treatment network, and potential biases reflected by the network structure.                                                                                                                            | 5      |
| Study characteristics                    | 18        | For each study, present characteristics for which data were extracted (e.g., study size, PICOS, follow-up period) and provide the citations.                                                                                                                                                                                                                                                                                                                 | 5 & 13 |
| Risk of bias within studies              | 19        | Present data on risk of bias of each study and, if available, any outcome level assessment.                                                                                                                                                                                                                                                                                                                                                                  | 5 & 14 |
| Results of individual studies            | 20        | For all outcomes considered (benefits or harms), present, for each study: 1) simple summary data for each intervention group, and 2) effect estimates and confidence intervals. <i>Modified approaches may be needed to deal with information from larger networks.</i>                                                                                                                                                                                      | 5 & 6  |
| Synthesis of results                     | 21        | Present results of each meta-analysis done, including confidence/credible intervals. <i>In larger networks, authors may focus on comparisons versus a particular comparator (e.g. placebo or standard care), with full findings presented in an appendix. League tables and forest plots may be considered to summarize pairwise comparisons.</i> If additional summary measures were explored (such as treatment rankings), these should also be presented. | 5 & 6  |
| <b>Exploration for inconsistency</b>     | <b>S5</b> | Describe results from investigations of inconsistency. This may include such information as measures of model fit to compare consistency and inconsistency models, <i>P</i> values from statistical tests, or summary of inconsistency estimates from different parts of the treatment network.                                                                                                                                                              | 5      |
| Risk of bias across studies              | 22        | Present results of any assessment of risk of bias across studies for the evidence base being studied.                                                                                                                                                                                                                                                                                                                                                        | 6      |
| Results of additional analyses           | 23        | Give results of additional analyses, if done (e.g., sensitivity or subgroup analyses, meta-regression analyses, <i>alternative network geometries studied, alternative choice of prior distributions for Bayesian analyses, and so forth</i> ).                                                                                                                                                                                                              | 6 & 16 |

|                     |    |                                                                                                                                                                                                                                                                                                                                                                                                                                |       |
|---------------------|----|--------------------------------------------------------------------------------------------------------------------------------------------------------------------------------------------------------------------------------------------------------------------------------------------------------------------------------------------------------------------------------------------------------------------------------|-------|
| <b>DISCUSSION</b>   |    |                                                                                                                                                                                                                                                                                                                                                                                                                                |       |
| Summary of evidence | 24 | Summarize the main findings, including the strength of evidence for each main outcome; consider their relevance to key groups (e.g., healthcare providers, users, and policy-makers).                                                                                                                                                                                                                                          | 6 & 7 |
| Limitations         | 25 | Discuss limitations at study and outcome level (e.g., risk of bias), and at review level (e.g., incomplete retrieval of identified research, reporting bias). <i>Comment on the validity of the assumptions, such as transitivity and consistency. Comment on any concerns regarding network geometry (e.g., avoidance of certain comparisons).</i>                                                                            | 7     |
| Conclusions         | 26 | Provide a general interpretation of the results in the context of other evidence, and implications for future research.                                                                                                                                                                                                                                                                                                        | 7     |
| <b>FUNDING</b>      |    |                                                                                                                                                                                                                                                                                                                                                                                                                                |       |
| Funding             | 27 | Describe sources of funding for the systematic review and other support (e.g., supply of data); role of funders for the systematic review. This should also include information regarding whether funding has been received from manufacturers of treatments in the network and/or whether some of the authors are content experts with professional conflicts of interest that could affect use of treatments in the network. | 10    |

PICOS = population, intervention, comparators, outcomes, study design.

\* Text in italics indicates wording specific to reporting of network meta-analyses that has been added to guidance from the PRISMA statement.

† Authors may wish to plan for use of appendices to present all relevant information in full detail for items in this section.

Supplementary Figure 1. Relative ranking of treatments for the ameloblastoma network based on the multidimensional scaling (MDS) approach.

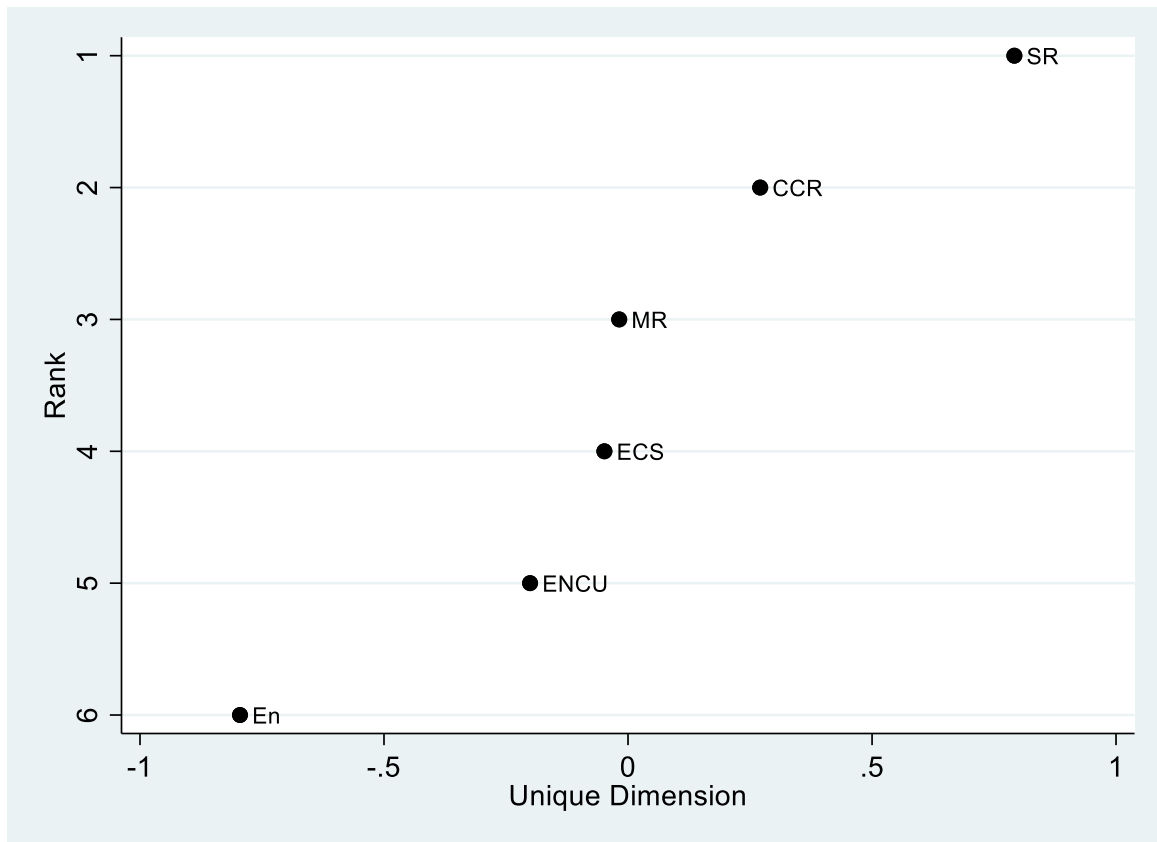

Notes: Larger values of the dimension correspond to higher ranks. CCR = Curettage + Cryotherapy, ECS = Enucleation + Carnoy's solution, En = Enucleation, ENCU = Enucleation + Curettage, MR = Marginal resection, SR = Segmental resection.



Supplementary Figure 3. Interval plot of treatment approach comparisons for recurrence outcome using Odds Ratio (OR) to measure the effect size.

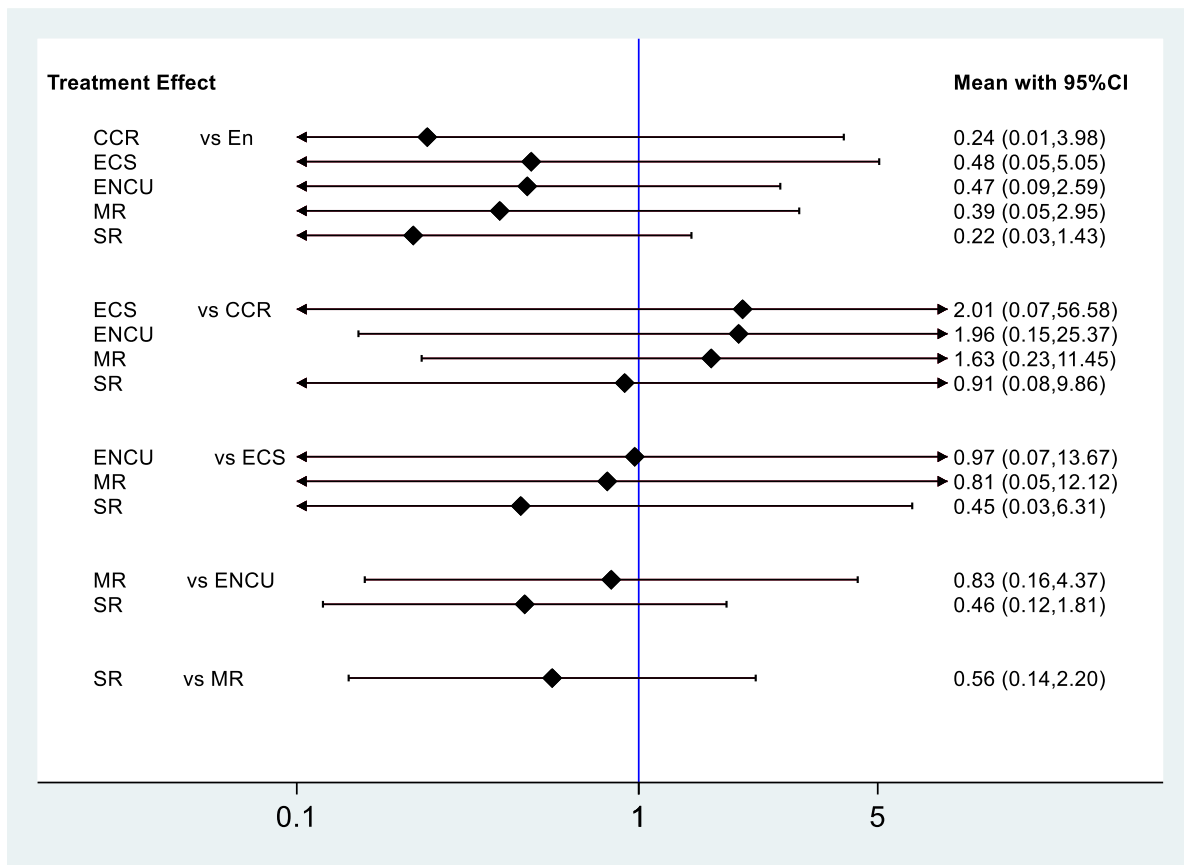

Notes: CCR = Curettage + Cryotherapy, ECS = Enucleation + Carnoy's solution, En = Enucleation, ENCU = Enucleation + Curettage, MR = Marginal resection, SR = Segmental resection.

Supplementary Figure 4. Network forest plots of treatment approach comparisons.

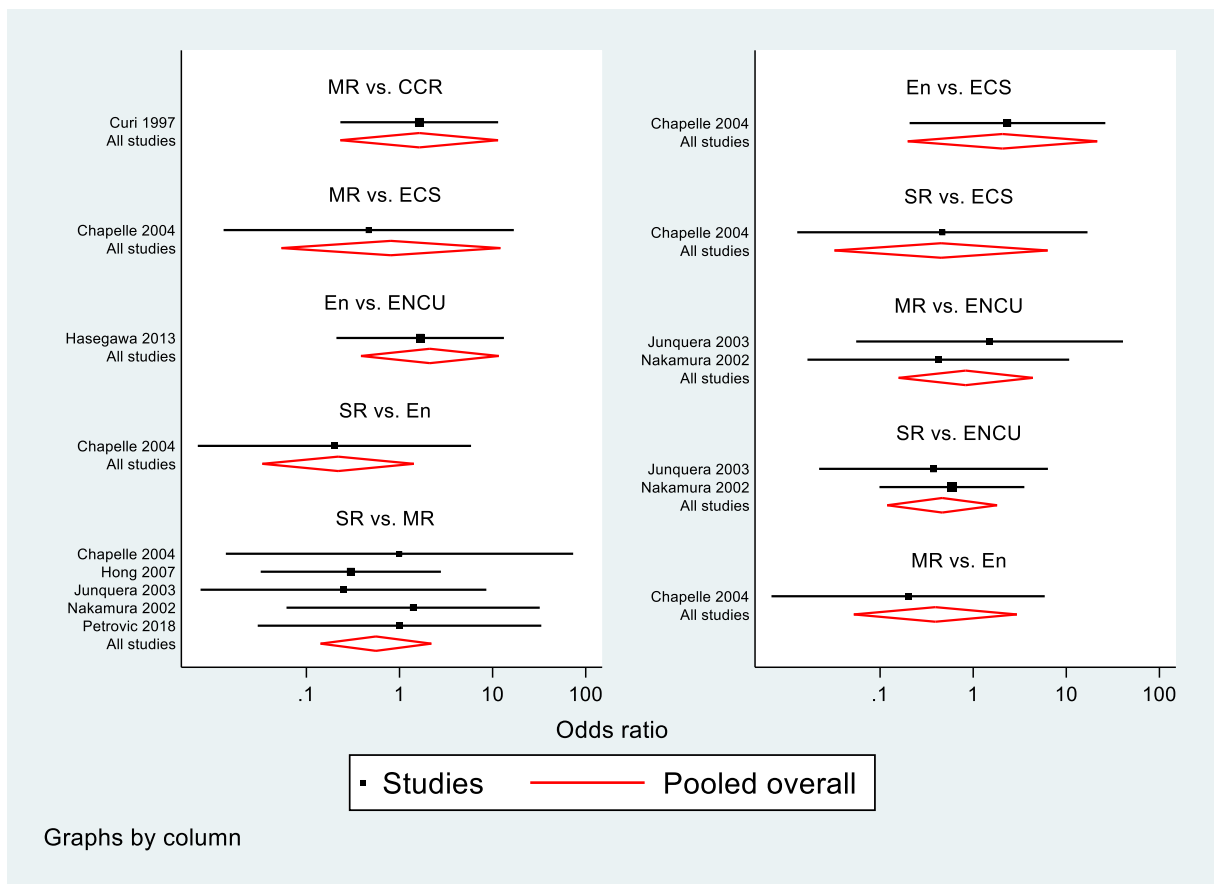

Notes: CCR = Curettage + Cryotherapy, ECS = Enucleation + Carnoy's solution, En = Enucleation, ENCU = Enucleation + Curettage, MR = Marginal resection, SR = Segmental resection.



Supplementary Figure 5. Cumulative probability curves for the ameloblastoma treatments network show that each treatment's estimated and predictive probabilities are up to a specific rank.

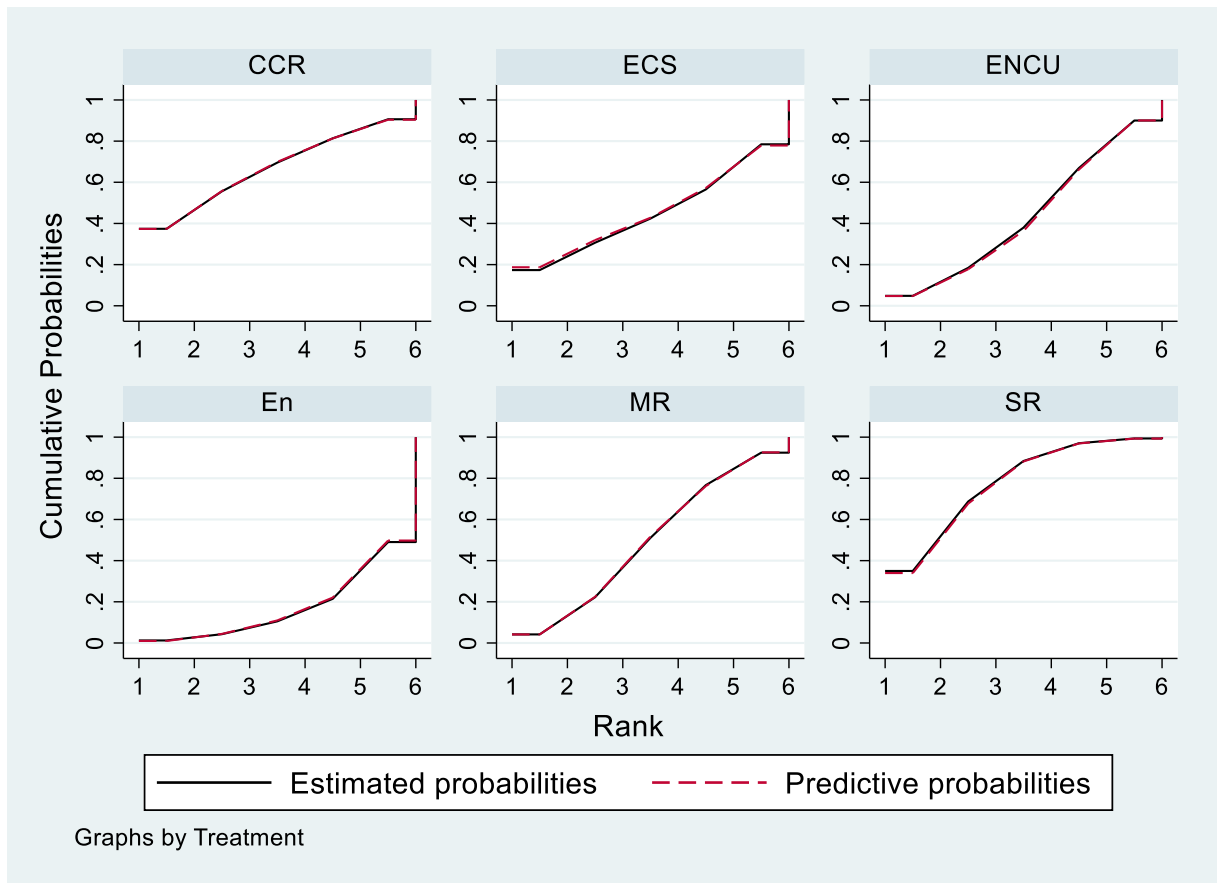

Notes: CCR = Curettage + Cryotherapy, ECS = Enucleation + Carnoy's solution, En = Enucleation, ENCU = Enucleation + Curettage, MR = Marginal resection, SR = Segmental resection.
